# Supplementary material for: Active Commuting to School among Spanish Preschool Children: A Temporal Change Study between 2013 and 2017
Source: MDPI journal article supplement (doi:10.3390/children11010003), 2023-12-20
Supplement: s1 [file s1]

# Supplementary Material

**Table S1.** Description of the main characteristics of each study included.

| Study name | Research centre (RC)/ Government institution (GB) | Collected data (year) | Localities                                                                                                                                                                                                                                                                                                                                                                                                           | Preschool children (sample) |
|------------|---------------------------------------------------|-----------------------|----------------------------------------------------------------------------------------------------------------------------------------------------------------------------------------------------------------------------------------------------------------------------------------------------------------------------------------------------------------------------------------------------------------------|-----------------------------|
| MOVIKIDS   | University of Castilla-La Mancha. RC              | 2013                  | Cuenca, Ciudad Real, Horcajo de Santiago, Iniesta, Mota del Cuervo, Quintanar del Rey. San Clemente, Villanueva de la Jara, Tarancón, Motilla del Palancar, Daimiel, Manzanares, Puertollano, Miguelturra, Campo de Criptana, Villarrubia de los ojos, Bolaños de Calatrava, Herencia, Tomelloso (Castilla-La Mancha)                                                                                                | 735                         |
| ESCA       | Generalitat Cataluña. GB                          | 2015–2016             | Alt Pirineu I Aran, Barcelona, Camp de Tarragona, Girona, Lleida, Terre de l'Ebre(Cataluña)                                                                                                                                                                                                                                                                                                                          | 419                         |
| PREFIT     | University of Granada. RC                         | 2014                  | Almería, Cádiz, Castellón de la Plana, Cuenca (Castilla La Mancha), Granada (Andalucía), Las Palmas (Islas Canarias), Madrid (Madrid), Mallorca, Vitoria (País Vasco), Zaragoza (Aragón), Castellón, (Valencia), Cuenca                                                                                                                                                                                              | 2867                        |
| Cuenca     | University of Castilla-La Mancha. RC              | 2015                  | Albacete, Ciudad Real, Cuenca, Guadalajara, Tomelloso, Almansa, Ontur, Villarrobledo, Alcoba, Argamasilla de Calatrava, Azuqueca de Henares, Cabezarrubias del puerto, Cañaveras, El Real de San Vicente, El Robledo, Fuensalida, Gálvez, La Solana, Landete, Las perdices, Los Yebenes, Madridejos, Mestanza, Miguel Esteban, Talavera de la Reina, Totanes, Villares del Saz, Viso del Marqués(Castilla-La Mancha) | 413                         |
| Barcelona  | Autonomous University of Barcelona. RC            | 2017                  | Terrassa (Cataluña)                                                                                                                                                                                                                                                                                                                                                                                                  | 353                         |
| N = 5      |                                                   | 2013–2017             | 66 localities                                                                                                                                                                                                                                                                                                                                                                                                        | 4787                        |

When the name of the study was inexistent, the name of the city where the research centre /government institution that conducted that study was included.
